# Supplementary material
Source: publisher site journal article supplement (https://www.spandidos-publications.com/7574/downloadSupplementary)
Supplement: Supplementary file 1 [file downloadSupplementary]

## Sheet: Table SVI
Table SVI. hub-FRDEGs selected by the random forest algorithm.
Gene	MeanDecreaseGini
PPARG	4.38252
HMOX1	0.805157
TGFB1	0.78624
TLR4	1.43538
MAPK3	1.01632
CAV1	0.878511
ATM	8.07276
HSPB1	0.581309
TIMP1	1.86361
CDKN1A	1.64396
TXN	10.0099
MAPK14	1.31103
FTH1	0.604924
CTSB	1.36229
ATF3	1.34382
PRDX1	2.74536
LCN2	2.57819
NEDD4	1.31504
FTL	2.48119
STEAP3	0.599732
IDO1	1.08105
MUC1	1.04135
DPP4	8.85971
CBS	0.579265
FURIN	0.73899
CDC25A	0.98347
ALOX15	4.91458
SOCS1	1.54346
TERT	0.533167
SAT1	1.93927
GDF15	0.699109
ALOX5	0.744133
FLT3	1.07675
CGAS	1.26201
ALOX15B	0.908203
AKR1C1	0.736555
TFR2	0.552128
SIAH2	3.44027
